# Supplementary material
Source: PubMed Central journal article supplement (PMC2853768)
Supplement: NIHMS183674-supplement-Supplement_1.pdf [file NIHMS183674-supplement-Supplement_1.pdf]

## Disruption of RNA metabolism in Neurological Disorders

A number of genes that play important roles in RNA metabolism have been implicated in neurological disorders. These are summarized in the table below. The 3' UTR CTG/CCTG expansions that occur in myotonic dystrophy cause mRNA to accumulate in foci which then sequester factors important for the correct adult splicing pattern of various genes such as the *Muscle Chloride Channel*.<sup>1,2</sup> Dominant Retinitis Pigmentosa (RP) can be caused by mutations in the ubiquitously expressed proteins (PRPF31, PRPF8 and HPRP3) that are essential for the correct assembly and function of the U4,U5 and U6 tri-snRNP in pre-mRNA splicing.<sup>2,3</sup> In retinal cell cultures mutant PRPF31 alters the efficiency of intron 3 removal from rhodopsin pre-mRNA, reducing rhodopsin and resulting in cell death.<sup>4</sup> In Prader-Willi syndrome loss of HB11-52, a small nucleolar RNA (snoRNA), alters the alternative splicing of the *Serotonin 2C Receptor*.<sup>2,5</sup> Recently mutations in *TAR DNA-binding protein 43 (TDP-43)* and *fused in sarcoma/translated in liposarcoma (FUS/TLS)*, RNA binding proteins important for splicing of certain genes,<sup>6-9</sup> have been reported to cause ALS.<sup>10-13</sup> There is therefore a precedent for mutations in essential genes involved in pre-mRNA splicing resulting in degeneration of specific groups of neurons. There can often also be unexpected links between the genes mutated in a particular disease and RNA metabolism. The gene mutated in X-linked SMA has been identified as *ubiquitin activating enzyme (UBE1)*.<sup>14</sup> Thus it might appear that this disease results from the disruption of a separate cellular pathway from the SMN and splicing pathway that causes proximal SMA. However altering ubiquitination reduces the level of U4/U6-U5 snRNP,<sup>15</sup> a critical component of the spliceosome, and thus splicing could be altered in this disorder.

As can be seen in the table below, not all mutations in RNA metabolism act through splicing. *Senataxin* mutations give rise to motor neuron disease or ataxia<sup>16</sup> and mutations in *immunoglobulin  $\mu$  binding protein 2 (IGHMBP2)* give rise to distal SMA.<sup>17</sup> Both proteins contain a similar RNA helicase domain and both are involved in tRNA and rRNA biogenesis.<sup>18,19</sup> Mutations in *glycyl-t-RNA synthetase* and *tyrosyl-t-RNA synthetase* cause the peripheral neuropathy CMT.<sup>20,21</sup> In mice loss of function alleles for these two genes does not mimic the peripheral neuropathy rather missense mutation that disrupt a particular property of tRNA-synthetase cause CMT. Interestingly the products of these mutant alleles are unable to localize to the distal axon in the same way that the wild-type protein does.<sup>22,23</sup> It is possible that this causes a deficiency of the enzyme at that site and, thus, CMT. In SMA it seems possible that either an alteration in the splicing of certain genes or in the localization of mRNA could be critical to the development of the phenotype. An understanding of how reduced SMN causes SMA may have a wider impact on our understanding of how mutations in genes important for RNA metabolism cause neurogenetic disease.

**Supplementary table 1** RNA metabolism and neurological disease

| Disease  | Molecular Defect                                           | Consequence         | Ref |
|----------|------------------------------------------------------------|---------------------|-----|
| DM1, DM2 | CUG/CCUG expansion in 3' UTR<br>RNA binds splicing factors | Altered Splicing    | 1,2 |
| FXS      | CGG expansion in 5'UTR<br>reduced FRAX expression          | Altered Translation | 24  |
| SCA8     | CUG expansion in 3'UTR                                     | ? Altered splicing  | 25  |
| HDL2     | CTG expansion in alternate<br>RNA binds splicing factors   | ? Altered splicing  | 26  |
| OPMD     | GCG expansion in <i>PAPBN1</i>                             | Polyadenylation     | 27  |

|                |                                             |                                           |         |
|----------------|---------------------------------------------|-------------------------------------------|---------|
| POMA           | Autoantibodies to <i>Nova 1</i>             | Altered splicing                          | 28      |
| Hu syn         | Autoantibodies to Hu proteins               | mRNA stability, export                    | 29      |
| MRS            | Mutations in <i>UPF3B</i>                   | Nonsense mediated decay                   | 30      |
| PWS            | Loss of <i>SNURF</i> expression             | Altered splicing<br>(Serotonin receptor)  | 5       |
| RP             | Mutations in <i>PRPF31,8,3</i>              | ? Altered splicing<br>Rodopsin            | 3,4     |
| LAAHD/<br>LCCS | Mutations in <i>GLE1</i>                    | Altered transport of<br>mRNA from nucleus | 31      |
| ALS            | Mutations in <i>SOD1</i>                    | ? unknown                                 | 32      |
| ALS            | Mutations in <i>TDP43</i>                   | ? altered splicing                        | 8,10,11 |
| ALS            | Mutations in <i>FUS/TLS</i>                 | ? altered splicing                        | 12,13   |
| DSMA           | Mutations in <i>IGHMBP2</i>                 | ?altered translation                      | 17,18   |
| CMT            | <i>tRNA synthetase</i>                      | ? Axon problem                            | 20-23   |
| SMA            | Loss of <i>SMN1</i> , retention <i>SMN2</i> | ? altered splicing/RNA<br>transport       | 33      |

Abbreviations: Diseases: DM Myotonic muscular dystrophy, FXS Fragile X syndrome, SCA spinocerebellar ataxia, HDL Huntington disease like, OMPD oculopharyngeal muscular dystrophy, POMA opsoclonus-myoclonus ataxia, Hu syn Hu syndrome, MRS Mental retardation syndrome, PWS Prader-Willi syndrome, RP Retinitis pigmentosa, LAAHD Lethal arthrogryposis with anterior horn cell disease, LCCS Lethal congenital contracture syndrome, ALS Amyotrophic Lateral Sclerosis, DSMA distal spinal muscular atrophy, CMT Charcot-Marie-Tooth Disease, SMA spinal muscular atrophy, Genes: FRAX fragile X protein, PAPBN1 Poly(A) binding protein nuclear 1, Nova 1 neuro-oncological ventral antigen 1, UPF3B regulator of nonsense transcripts homolog B, SNURF SNRPN upstream reading frame–small nuclear ribonucleoprotein polypeptide N, PRPF 31 or 8 or 3 pre-mRNA processing factor 31 or 8 or 3, GLE1 GLE1 mRNA export mediator homolog, SOD1 Superoxide dismutase 1, TDP43 TAR DNA binding protein 43, FUS/TLS fused in sarcoma/translated in liposarcoma, IGHMBP2 immunoglobulin mu binding protein 2, SMN survival motor neuron. Table adapted from Lukong et al.<sup>34</sup>

## References

1. Ranum, L.P. & Cooper, T.A. RNA-mediated neuromuscular disorders. *Annu Rev Neurosci* **29**, 259-77 (2006).
2. Wang, G.S. & Cooper, T.A. Splicing in disease: disruption of the splicing code and the decoding machinery. *Nat Rev Genet* **8**, 749-61 (2007).
3. Mordes, D. et al. Pre-mRNA splicing and retinitis pigmentosa. *Mol Vis* **12**, 1259-71 (2006).
4. Yuan, L., Kawada, M., Havlioglu, N., Tang, H. & Wu, J.Y. Mutations in PRPF31 inhibit pre-mRNA splicing of rhodopsin gene and cause apoptosis of retinal cells. *J Neurosci* **25**, 748-57 (2005).
5. Kishore, S. & Stamm, S. The snoRNA HBII-52 regulates alternative splicing of the serotonin receptor 2C. *Science* **311**, 230-2 (2006).
6. Buratti, E. et al. Nuclear factor TDP-43 and SR proteins promote in vitro and in vivo CFTR exon 9 skipping. *Embo J* **20**, 1774-84 (2001).
7. Mercado, P.A., Ayala, Y.M., Romano, M., Buratti, E. & Baralle, F.E. Depletion of TDP 43 overrides the need for exonic and intronic splicing enhancers in the human apoA-II gene. *Nucleic Acids Res* **33**, 6000-10 (2005).
8. Buratti, E. & Baralle, F.E. Multiple roles of TDP-43 in gene expression, splicing regulation, and human disease. *Front Biosci* **13**, 867-78 (2008).
9. Lagier-Tourenne, C. & Cleveland, D.W. Rethinking ALS: the FUS about TDP-43. *Cell* **136**, 1001-4 (2009).
10. Sreedharan, J. et al. TDP-43 mutations in familial and sporadic amyotrophic lateral sclerosis. *Science* **319**, 1668-72 (2008).
11. Kabashi, E. et al. TARDBP mutations in individuals with sporadic and familial amyotrophic lateral sclerosis. *Nat Genet* **40**, 572-4 (2008).
12. Kwiatkowski, T.J., Jr. et al. Mutations in the FUS/TLS gene on chromosome 16 cause familial amyotrophic lateral sclerosis. *Science* **323**, 1205-8 (2009).
13. Vance, C. et al. Mutations in FUS, an RNA processing protein, cause familial amyotrophic lateral sclerosis type 6. *Science* **323**, 1208-11 (2009).
14. Ramser, J. et al. Rare missense and synonymous variants in UBE1 are associated with X-linked infantile spinal muscular atrophy. *Am J Hum Genet* **82**, 188-93 (2008).
15. Bellare, P. et al. A role for ubiquitin in the spliceosome assembly pathway. *Nat Struct Mol Biol* **15**, 444-51 (2008).
16. Chen, Y.Z. et al. Senataxin, the yeast Sen1p orthologue: characterization of a unique protein in which recessive mutations cause ataxia and dominant mutations cause motor neuron disease. *Neurobiol Dis* **23**, 97-108 (2006).
17. Grohmann, K. et al. Mutations in the gene encoding immunoglobulin mu-binding protein 2 cause spinal muscular atrophy with respiratory distress type 1. *Nat Genet* **29**, 75-7 (2001).
18. Guenther, U.P. et al. IGHMBP2 is a ribosome-associated helicase inactive in the neuromuscular disorder distal SMA type 1 (DSMA1). *Hum Mol Genet* (2009).

19. de Planell-Sagner, M., Schroeder, D.G., Rodicio, M.C., Cox, G.A. & Mourelatos, Z. Biochemical and genetic evidence for a role of IGHMBP2 in the translational machinery. *Hum Mol Genet* (2009).
20. Antonellis, A. et al. Glycyl tRNA synthetase mutations in Charcot-Marie-Tooth disease type 2D and distal spinal muscular atrophy type V. *Am J Hum Genet* **72**, 1293-9 (2003).
21. Jordanova, A. et al. Disrupted function and axonal distribution of mutant tyrosyl-tRNA synthetase in dominant intermediate Charcot-Marie-Tooth neuropathy. *Nat Genet* **38**, 197-202 (2006).
22. Antonellis, A. et al. Functional analyses of glycyl-tRNA synthetase mutations suggest a key role for tRNA-charging enzymes in peripheral axons. *J Neurosci* **26**, 10397-406 (2006).
23. Nangle, L.A., Zhang, W., Xie, W., Yang, X.L. & Schimmel, P. Charcot-Marie-Tooth disease-associated mutant tRNA synthetases linked to altered dimer interface and neurite distribution defect. *Proc Natl Acad Sci U S A* **104**, 11239-44 (2007).
24. Penagarikano, O., Mulle, J.G. & Warren, S.T. The pathophysiology of fragile x syndrome. *Annu Rev Genomics Hum Genet* **8**, 109-29 (2007).
25. Gatchel, J.R. & Zoghbi, H.Y. Diseases of unstable repeat expansion: mechanisms and common principles. *Nat Rev Genet* **6**, 743-55 (2005).
26. Rudnicki, D.D. et al. Huntington's disease--like 2 is associated with CUG repeat-containing RNA foci. *Ann Neurol* **61**, 272-82 (2007).
27. Brais, B. et al. Short GCG expansions in the PABP2 gene cause oculopharyngeal muscular dystrophy. *Nat Genet* **18**, 164-7 (1998).
28. Licatalosi, D.D. & Darnell, R.B. Splicing regulation in neurologic disease. *Neuron* **52**, 93-101 (2006).
29. Darnell, R.B. & Posner, J.B. Paraneoplastic syndromes involving the nervous system. *N Engl J Med* **349**, 1543-54 (2003).
30. Tarpey, P.S. et al. Mutations in UPF3B, a member of the nonsense-mediated mRNA decay complex, cause syndromic and nonsyndromic mental retardation. *Nat Genet* **39**, 1127-33 (2007).
31. Nousiainen, H.O. et al. Mutations in mRNA export mediator GLE1 result in a fetal motoneuron disease. *Nat Genet* **40**, 155-7 (2008).
32. Pasinelli, P. & Brown, R.H. Molecular biology of amyotrophic lateral sclerosis: insights from genetics. *Nat Rev Neurosci* **7**, 710-23 (2006).
33. Lefebvre, S. et al. Identification and characterization of a spinal muscular atrophy-determining gene. *Cell* **80**, 155-65 (1995).
34. Lukong, K.E., Chang, K.W., Khandjian, E.W. & Richard, S. RNA-binding proteins in human genetic disease. *Trends Genet* **24**, 416-25 (2008).
